# Supplementary material
Source: PubMed Central journal article supplement (PMC10874233)

**Figure S1**

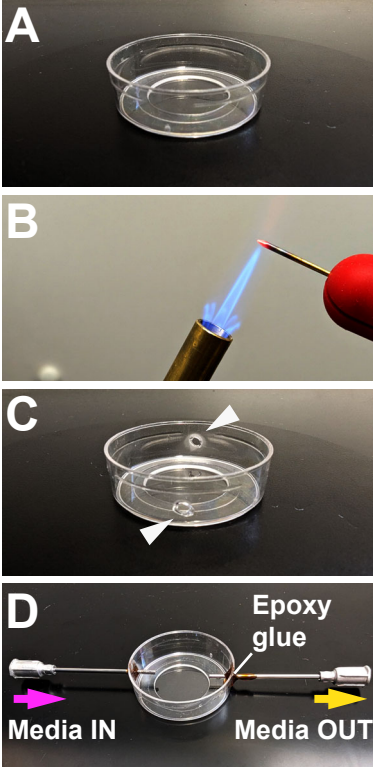

Supplement: NIHMS1964400-supplement-Supplemental_Figure_1.pdf [file NIHMS1964400-supplement-Supplemental_Figure_1.pdf]
